# Supplementary material for: Characterization of 3-Hydroxyeticyclidine (3-HO-PCE) Metabolism in Human Liver Microsomes and Biological Samples Using High-Resolution Mass Spectrometry
Source: MDPI journal article supplement (doi:10.3390/metabo13030432), 2023-03-16
Supplement: s1 [file s1]

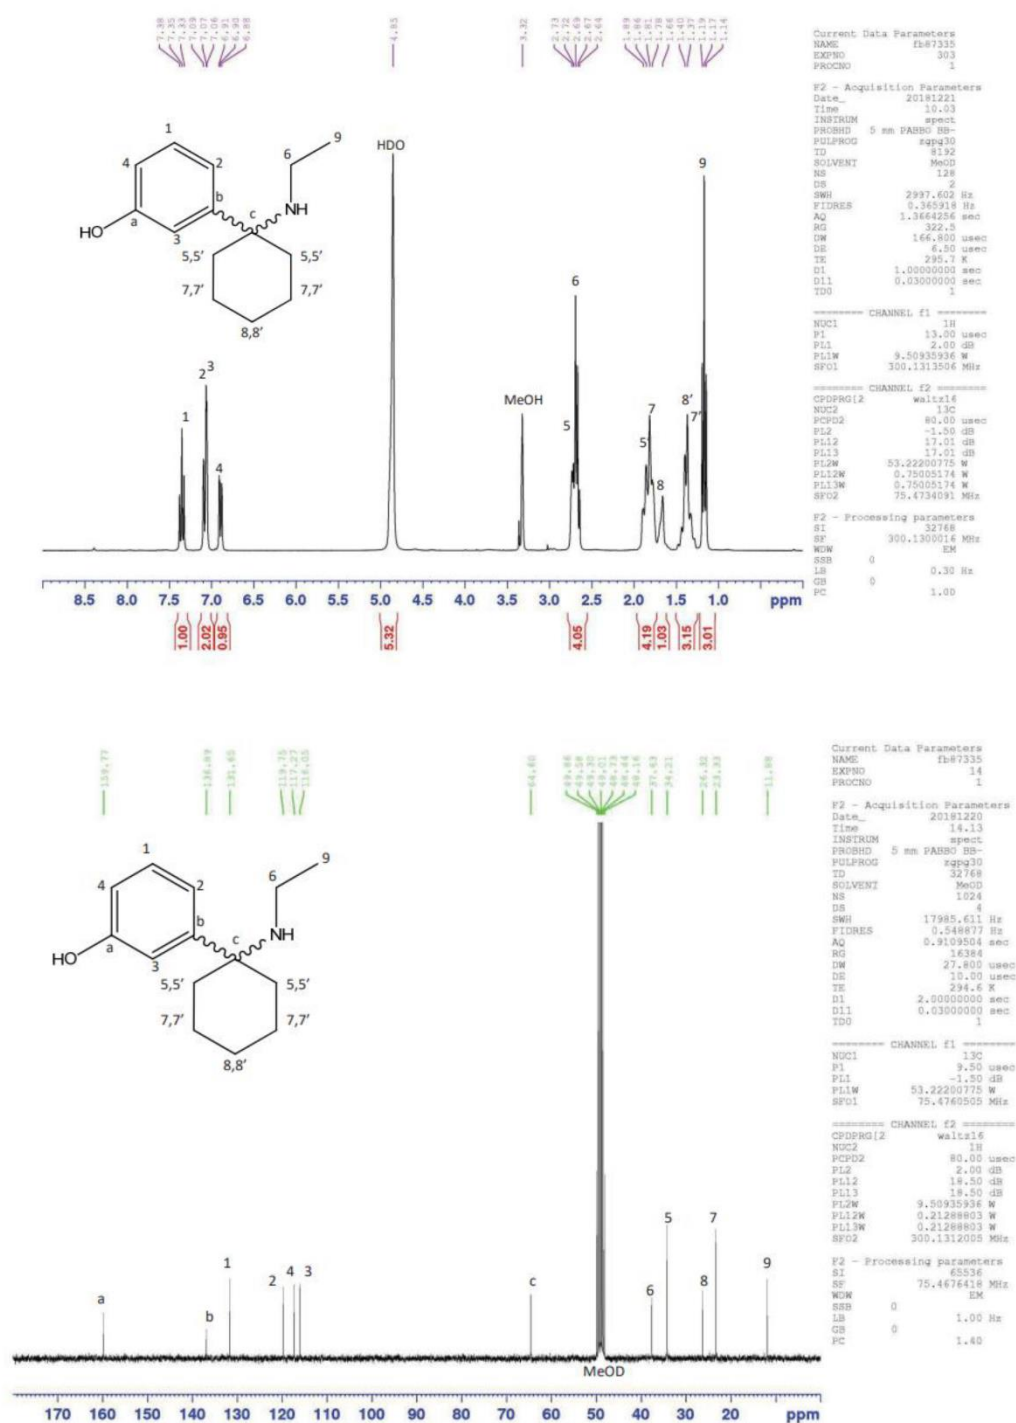

**Figure S1.** <sup>1</sup>H NMR (top) and <sup>13</sup>C NMR (bottom) spectra of 3-HO-PCE.

**3-HO-PCE**

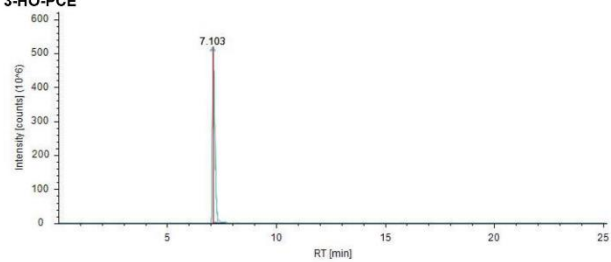

**M1**

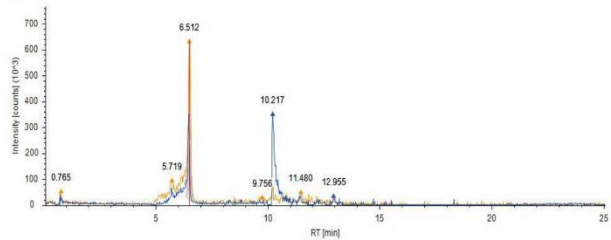

**M2 :**

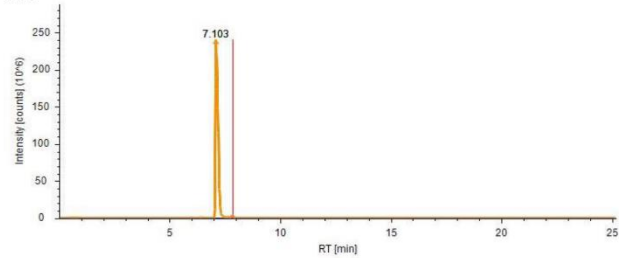

**M3**

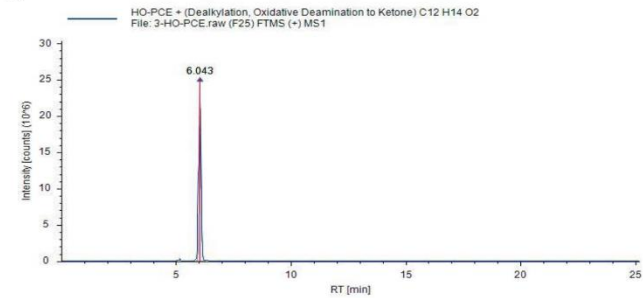

M4

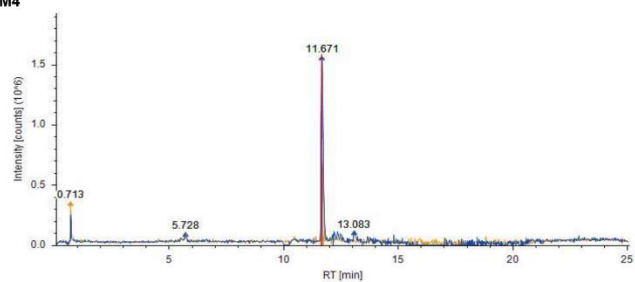

M5

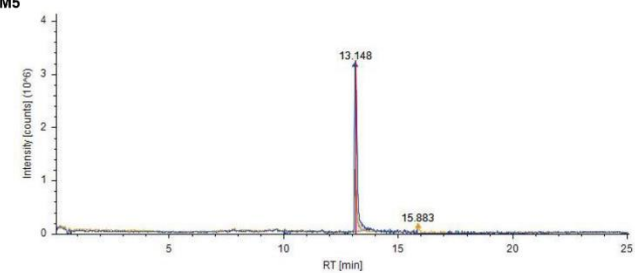

M6a

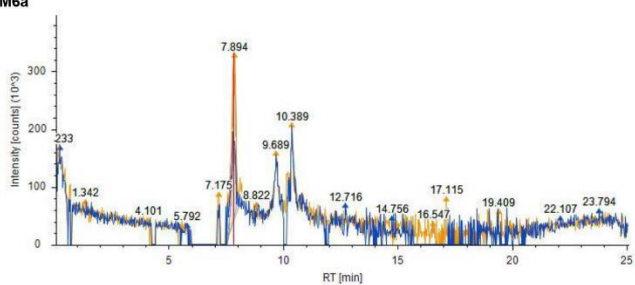

M6b

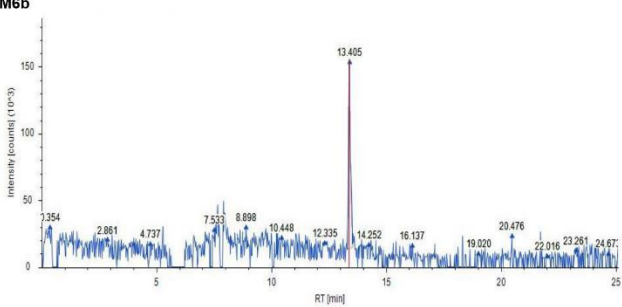

M7

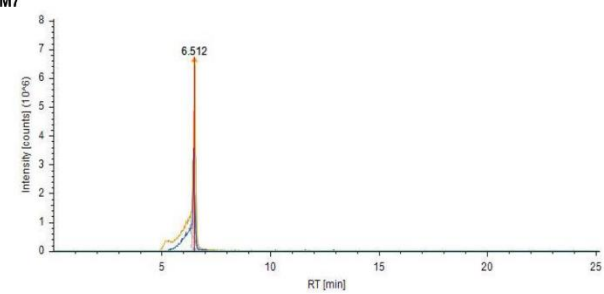

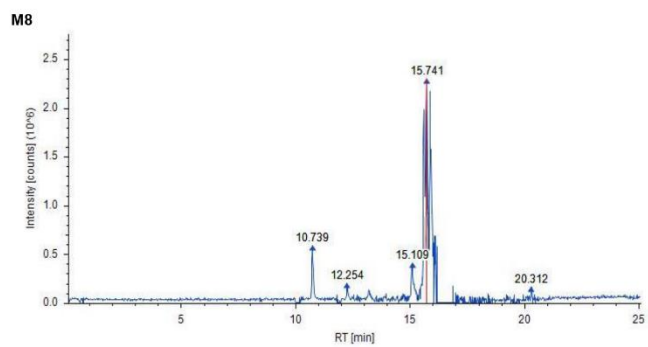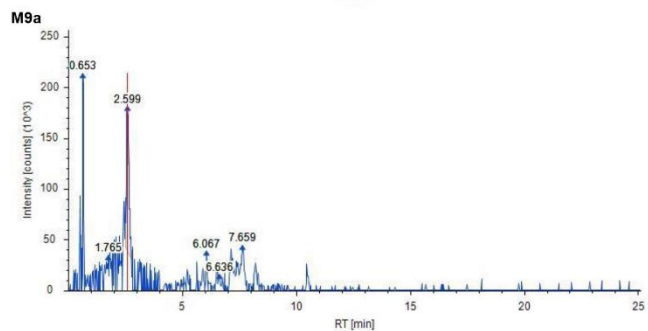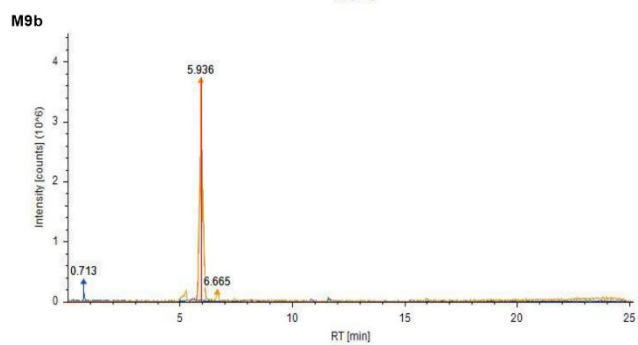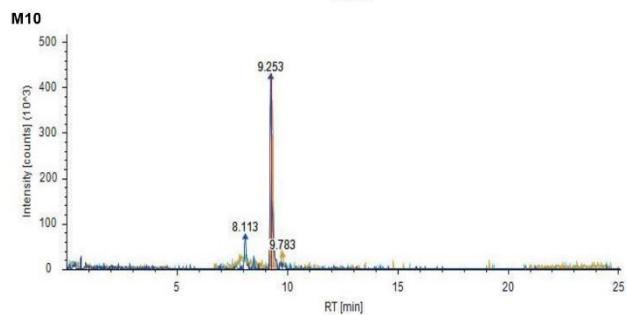

**M11**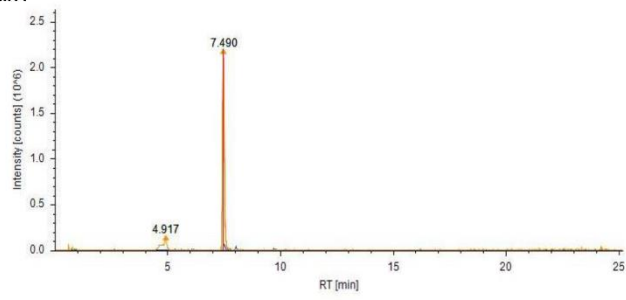**M12**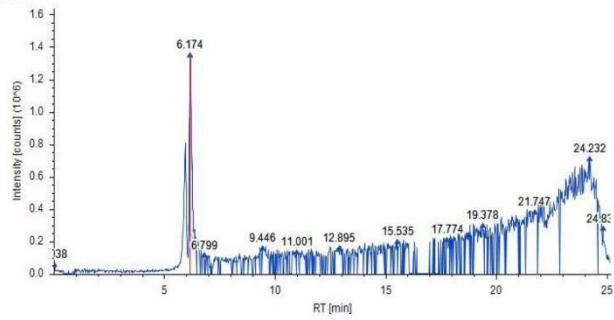**M13**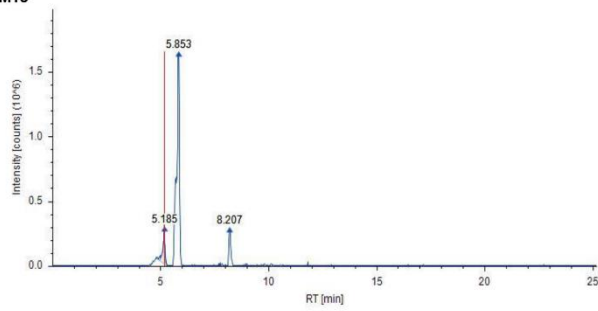**M14**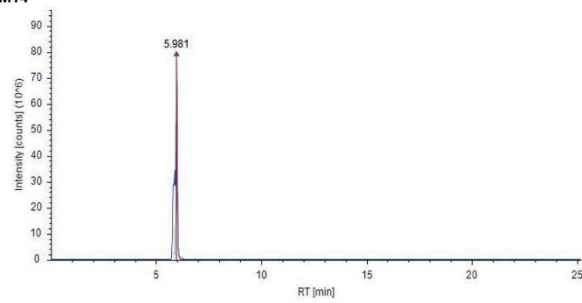**M15**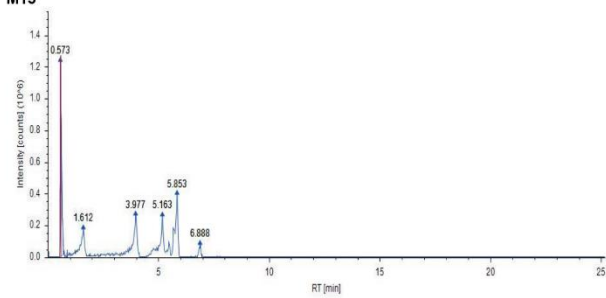

**Figure S2.** Extracted chromatograms of 3-HO-PCE and its potential metabolites from HLM, urine or hair.

*Putative structure elucidation proposed by Compound Discoverer software on each ddMS2 spectra was consulted but not used to build the metabolic profile of 3-HO-PCE, and is provided here for informational purposes only. M6b did not trigger a ddMS2 fragmentation due its low abundance.*

### 3-HO-CPE

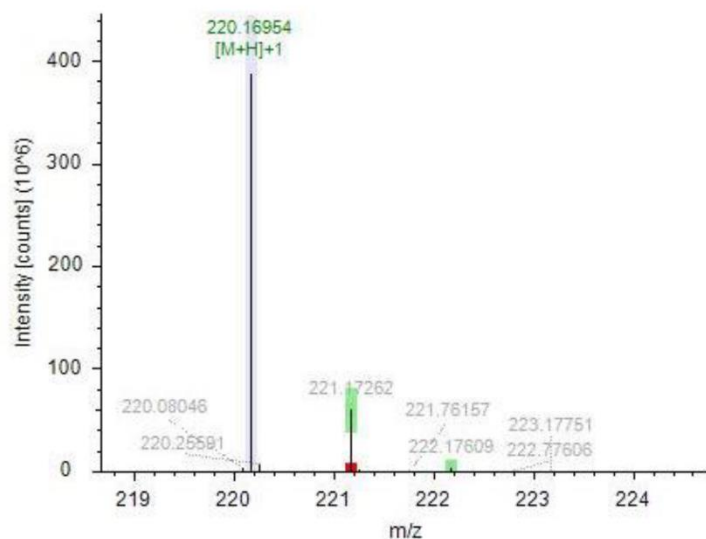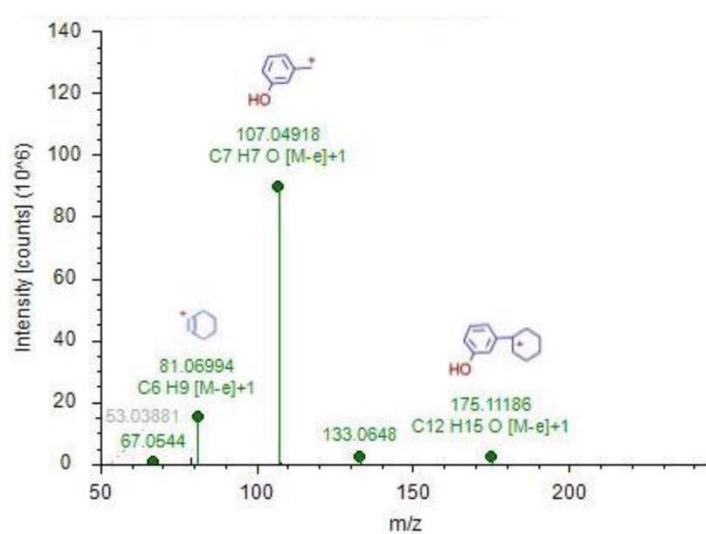

**Figure S3.** Full scan (Top) and ddM2 (Bottom) High resolution mass spectra of 3-HO-PCE and its putative metabolites.
